# Supplementary material for: Mitochondria as a Target of Environmental Toxicants
Source: PubMed Central journal article supplement — Toxicol Sci. 2013 Apr 29;134(1):1–17. doi: 10.1093/toxsci/kft102 (PMC3693132; doi:10.1093/toxsci/kft102), 2013-04-29
Supplement: supp_kft102_toxsci_13_0062_File004.pdf [file supp_kft102_toxsci_13_0062_File004.pdf]

Supplemental Table 1

**Mitochondria as a Target of Environmental Toxicants**

Joel N. Meyer, Maxwell C.K. Leung, John P. Rooney, Ataman Sendoel, Michael O. Hengartner,

Glen E. Kisby, Amanda S. Bess

This Supplemental Table is a compilation of studies that have directly compared nDNA to mtDNA damage after chemical exposure, or by other means provided data supporting the importance of mtDNA damage for the toxicity of those chemicals (or, in a few cases, nonchemical stressors). Earlier (pre-1970) reports exist but are not included due to difficulties in interpreting earlier methodologies. Similarly, early reports comparing oxidative damage in mtDNA and nDNA before understanding the importance of artefactual oxidation during DNA isolation (Anson *et al.*, 2000) have not been included.

| <b>Chemical or Stressor</b>                            | <b>Model</b>                         | <b>Approach</b>                      | <b>mtDNA/nDNA damage ratio</b>        | <b>Citation</b>                |
|--------------------------------------------------------|--------------------------------------|--------------------------------------|---------------------------------------|--------------------------------|
| 2-Acetylaminofluorene (2AAF)                           | male rats                            | <sup>32</sup> P postlabeling         | ~2                                    | Balansky et al. 1996           |
| Aflatoxin B <sub>1</sub>                               | rat liver                            | LSC                                  | ~4-6                                  | Niranjan et al 1982            |
|                                                        | rat, mouse, and hamster liver        | LSC                                  | 2-20 (no damage detected in mice)     | Niranjan et al., 1986          |
|                                                        | rat liver                            | LSC                                  | 0.47                                  | Shamsuddin et al. 1987         |
| 5-aminolevulinic acid                                  | cell culture (various cell types)    | QPCR                                 | ~1-2                                  | Onuki et al., 2004             |
| 2-Amino-3-methylimidazo[4,5-f]quinoline (IQ)           | rat liver                            | <sup>32</sup> P postlabeling         | 0.5 after one dose, ~1 after 10 doses | Davis et al. 1994              |
| 2-Amino-1-methyl-6-phenylimidazo[4,5-b]pyridine (PhIP) | rat liver                            | <sup>32</sup> P postlabeling         | ~1 after one dose, ~2 after 10 doses  | Davis et al. 1994              |
| Benzo(a)pyrene                                         | MCL-5 cells                          | Chemoiluminescent immunoassay        | ~10                                   | Divi et al. 2002               |
|                                                        | killifish (larvae and adult tissues) | QPCR                                 | ~1-4                                  | Jung et al. 2009a, 2009b, 2010 |
|                                                        | male rats                            | <sup>32</sup> P postlabeling and SFS | 1.5-2                                 | Balansky et al. 1996           |

|                                                                                     |                                                                                                                                                                          |                                                                        |                                                                                               |                                                                                          |
|-------------------------------------------------------------------------------------|--------------------------------------------------------------------------------------------------------------------------------------------------------------------------|------------------------------------------------------------------------|-----------------------------------------------------------------------------------------------|------------------------------------------------------------------------------------------|
| BPDE; BPDE/BaP;<br>BaP                                                              | various cell lines                                                                                                                                                       | LSC                                                                    | 40-100 (Backer and Weinstein papers);<br>4.8-16.5 (Stairs et al.);<br>1 (Ayala-Torres et al.) | Backer and Weinstein 1980,<br>1982; Stairs et al.,<br>1983; Ayala-Torres et al.,<br>2000 |
| Bleomycin                                                                           | A549 cells                                                                                                                                                               | QPCR                                                                   | ~2                                                                                            | Brar et al., 2012                                                                        |
| Butadiene diepoxide                                                                 | human fibroblasts                                                                                                                                                        | QPCR                                                                   | >1                                                                                            | Ayala-Torres et al.,<br>2000                                                             |
| Carcinogens<br>(multiple; benzidine<br>and 4-Nitroquinoline-<br>N-oxide especially) | yeast                                                                                                                                                                    | induction of petites<br>and growth on a<br>nonfermentable<br>medium    | not directly<br>measured                                                                      | Egilsson et al., 1979                                                                    |
| Cigarette Smoke                                                                     | male rats                                                                                                                                                                | <sup>32</sup> P postlabeling                                           | 0.65-15                                                                                       | Balansky et al. 1996                                                                     |
|                                                                                     | bronchoalveolar<br>lavage cells (human)                                                                                                                                  | QPCR                                                                   | 13; mtDNA deletions<br>also noted                                                             | Ballinger et al., 1996                                                                   |
| Cisplatin                                                                           | CHO cells                                                                                                                                                                | Southern Blot                                                          | 0.64-0.84                                                                                     | LeDoux et al. 1992                                                                       |
|                                                                                     | CHO cells                                                                                                                                                                | Dissociation-<br>enhanced lanthanide<br>fluoroimmunoassay<br>(DELFI A) | ~4-6                                                                                          | Olivero et al. 1995                                                                      |
|                                                                                     | Exposure of young<br>adult (12 h post-L4)<br><i>C. elegans</i> to 1 mM<br>in NGM plates for 12<br>h resulted in ~0.7<br>nDNA lesions/10 kb,<br>vs ~0.3 mtDNA<br>lesions. | QPCR                                                                   | ~0.5                                                                                          | unpublished data:<br>Meyer JN, Sendoel<br>A, Hengartner MO,<br>Van Houten B              |
|                                                                                     | pregnant rats dosed;<br>maternal and fetal<br>tissues examined                                                                                                           | DELFI A                                                                | <<1 to 40 or more;<br>highly variable by<br>tissue                                            | Giurgiovich et al.<br>1997                                                               |
|                                                                                     | rat gastric and<br>intestinal tissue                                                                                                                                     | QPCR                                                                   | nDNA damage not<br>detected                                                                   | Yañez et al., 2003                                                                       |
|                                                                                     | HNSCC cells                                                                                                                                                              | Atomic absorption<br>spectroscopy of<br>isolated DNA                   | ~200-600                                                                                      | Yang et al. 2006                                                                         |
|                                                                                     | L1210 cells                                                                                                                                                              | QPCR                                                                   | ~0.4                                                                                          | Kalinowski 1992                                                                          |
| tumors in mice                                                                      | Atomic absorption<br>spectroscopy of<br>isolated DNA                                                                                                                     | ~50                                                                    | Murata et al., 1990                                                                           |                                                                                          |
| Decarbamoyl<br>mitomycin C                                                          | MCF-7 cells                                                                                                                                                              | QPCR                                                                   | ~0.4                                                                                          | Boamah et al., 2010                                                                      |
| 7H-Dibenzo(c,g)-<br>carbazole and<br>derivatives                                    | mouse liver                                                                                                                                                              | <sup>32</sup> P postlabeling                                           | 0.2-1.1                                                                                       | Périn-Roussel et al.<br>1995                                                             |
| Diepoxybutane                                                                       | 6C2 chicken cells                                                                                                                                                        | QPCR                                                                   | ~1                                                                                            | LaRiviere et al. 2009                                                                    |
| Diethylstilbestrol                                                                  | rat liver and kidney                                                                                                                                                     | <sup>32</sup> P postlabeling                                           | ~7 (liver) and ~15<br>(kidney)                                                                | Thomas and Roy,<br>2001                                                                  |

|                          |                                                                                                                                                     |                                                                                    |                                                                                     |                                                                    |
|--------------------------|-----------------------------------------------------------------------------------------------------------------------------------------------------|------------------------------------------------------------------------------------|-------------------------------------------------------------------------------------|--------------------------------------------------------------------|
| Dimethylnitrosamine      | rat liver                                                                                                                                           | gel electrophoresis, isopycnic centrifugation                                      | 1.7-2.8                                                                             | Wilkinson et al. 1975                                              |
|                          | rat liver                                                                                                                                           | HPLC/RIA                                                                           | 1.4                                                                                 | Myers et al. 1988                                                  |
|                          | rat liver                                                                                                                                           | LSC                                                                                | 2.2-7.7                                                                             | Wunderlich et al. 1972                                             |
|                          | hamster liver                                                                                                                                       | LSC                                                                                | 3.8-6.0                                                                             | Wunderlich et al. 1972                                             |
| Dioxin                   | mouse liver                                                                                                                                         | Gel electrophoresis with enzyme (formamide-pyrimidine DNA N-glycosylase) digestion | ~2                                                                                  | Shen et al., 2005                                                  |
| Doxorubicin (adriamycin) | male rat heart and liver                                                                                                                            | LC/ESI/MS/MS for 8-oxo-dG                                                          | ~ 2                                                                                 | Palmeira et al. 1997                                               |
|                          | MCF-7 cells                                                                                                                                         | gel electrophoresis for interstrand crosslinks                                     | ~0.7                                                                                | Cullinane et al., 2000                                             |
|                          | human autopsy samples                                                                                                                               | PCR                                                                                | mtDNA depletion and deletions/mutations observed; nDNA damage not directly measured | Lebrecht et al., 2005                                              |
|                          | Exposure of young adult (12 h post-L4) <i>C. elegans</i> to 1 mM in NGM plates for 12 h resulted in ~0.7 nDNA lesions/10 kb, vs ~0.3 mtDNA lesions. | QPCR                                                                               | ~1                                                                                  | unpublished data: Meyer JN, Sandoel A, Hengartner MO, Van Houten B |
| Epichlorohydrin          | 6C2 chicken cells                                                                                                                                   | QPCR                                                                               | ~0.28                                                                               | LaRiviere et al. 2009                                              |
| Epibromohydrin           | 6C2 chicken cells                                                                                                                                   | QPCR                                                                               | ~0.38                                                                               | LaRiviere et al. 2009                                              |
| Ethanol                  | rat liver                                                                                                                                           | QPCR                                                                               | no direct comparisons to nDNA                                                       | Bailey et al., 2006; Cakir et al., 2007                            |
| Etoposide                | Exposure of young adult (12 h post-L4) <i>C. elegans</i> to 1 mM in NGM plates for 12 h resulted in ~0.7 nDNA lesions/10 kb, vs ~0.3 mtDNA lesions. | QPCR                                                                               | <1 (no mtDNA damage detected)                                                       | unpublished data: Meyer JN, Sandoel A, Hengartner MO, Van Houten B |
| 5-Fluorouracil           | rat gastric and intestinal tissue                                                                                                                   | QPCR                                                                               | nDNA damage not detected                                                            | Yañez et al., 2003                                                 |

|                                                                                  |                                                                                                                                                                                            |                                                                                  |                                                              |                                                                                                                                                                                                              |
|----------------------------------------------------------------------------------|--------------------------------------------------------------------------------------------------------------------------------------------------------------------------------------------|----------------------------------------------------------------------------------|--------------------------------------------------------------|--------------------------------------------------------------------------------------------------------------------------------------------------------------------------------------------------------------|
| H <sub>2</sub> O <sub>2</sub>                                                    | cell culture (various cell types), <i>C. elegans</i>                                                                                                                                       | QPCR                                                                             | 2-3 fold or more                                             | Yakes and Van Houten 1997; Salazar and Van Houten, 1997; Ballinger et al., 1999; Ballinger et al., 2000; Santos et al., 2003, 2004, 2006; Hunter et al., 2012; Furda et al., 2012; Ayala-Torres et al., 2000 |
| Hypoxia                                                                          | rat brain                                                                                                                                                                                  | QPCR                                                                             | greater in mtDNA (not quantified precisely)                  | Englander et al., 1999                                                                                                                                                                                       |
| Hypoxia caused by cobalt chloride                                                | PC12 cells                                                                                                                                                                                 | QPCR                                                                             | greater in mtDNA (not quantified precisely)                  | Wang et al., 2000                                                                                                                                                                                            |
| Indomethacin                                                                     | rat gastric and intestinal tissue                                                                                                                                                          | QPCR                                                                             | nDNA damage not detected                                     | Yañez et al., 2003                                                                                                                                                                                           |
| Lipopolysaccharide                                                               | rat liver                                                                                                                                                                                  | PCR                                                                              | no direct comparison; mtDNA depletion and deletions measured | Suliman et al., 2003, 2004, 2005                                                                                                                                                                             |
| Menadione                                                                        | HeLa and RCSN-3 cells                                                                                                                                                                      | Alkaline Southern Blot (mtDNA); Quantitative Alkaline Gel Electrophoresis (nDNA) | mtDNA damage detectable at doses lower than for nDNA damage  | Koczor et al 2009                                                                                                                                                                                            |
| Methylazoxymethanol (MAM), activated (no DNA damage detected without activation) | Exposure of L1 stage <i>C. elegans</i> to 400 uM activated MAM (Eizirik and Kisby 1995) for 24 h in K medium without food led to 0.4-0.6 lesions/10 kb 24 and 48 h later, in both genomes. | QPCR                                                                             | ~1                                                           | unpublished data: Bess AS, Kisby GE, Meyer JN                                                                                                                                                                |
| Methylene blue, photoactivated                                                   | human fibroblasts                                                                                                                                                                          | Southern Blot                                                                    | much more mtDNA damage (nDNA damage not detected)            | Anson et al., 1998                                                                                                                                                                                           |
| Methylmethane-sulfonate (MMS)                                                    | rat liver                                                                                                                                                                                  | gel electrophoresis, isopycnic centrifugation                                    | ~1                                                           | Wilkinson et al. 1975                                                                                                                                                                                        |
|                                                                                  | <i>C. elegans</i> dosed in liquid                                                                                                                                                          | QPCR                                                                             | ~0.5                                                         | Hunter et al., 2012                                                                                                                                                                                          |
|                                                                                  | mouse embryonic fibroblasts                                                                                                                                                                | QPCR                                                                             | ~0.67                                                        | Furda et al., 2012                                                                                                                                                                                           |
|                                                                                  | human fibroblasts                                                                                                                                                                          | QPCR                                                                             | ~0.67                                                        | Santos et al. 2006                                                                                                                                                                                           |
| 4-(Methylnitrosamino)-1-(3pyridyl)-1-butanone (NNK)                              | rat lung and liver                                                                                                                                                                         | LC-ESI-MS/MS-SRM                                                                 | ~2-4.5                                                       | Stepanov and Hecht 2009                                                                                                                                                                                      |

|                                                                                            |                                        |                                                                 |                                                                                                                          |                                               |
|--------------------------------------------------------------------------------------------|----------------------------------------|-----------------------------------------------------------------|--------------------------------------------------------------------------------------------------------------------------|-----------------------------------------------|
| 1-Methyl-4-phenyl-1,2,3,6-tetrahydropyridine (MPTP)                                        | mouse brain                            | QPCR                                                            | ~2 (Mandavilli study); no direct comparison (Yamaguchi study)                                                            | Mandavilli et al 2000, Yamaguchi et al., 2006 |
| Methylnitrosourea (MNU)                                                                    | CHO cells                              | Southern Blot                                                   | higher in mtDNA                                                                                                          | LeDoux et al. 1992                            |
| N-nitroso-N-butylurea                                                                      | rat liver                              | HPLC/RIA                                                        | 2.3                                                                                                                      | Myers et al. 1988                             |
| N-methyl-N-nitrourea (DMN)                                                                 | rat liver                              | LSC                                                             | 2.9-16.9 (liver) 4.4-7.5 (kidney/heart)                                                                                  | Wunderlich et al. 1970                        |
| Nitrogen Mustard                                                                           | CHO cells                              | Southern Blot                                                   | ~0.67                                                                                                                    | LeDoux et al. 1992                            |
| 3-Nitropropionic acid (3-NPA)                                                              | PC12 cells                             | QPCR                                                            | ~2                                                                                                                       | Mandavilli et al., 2005                       |
| Nucleoside reverse transcriptase inhibitors (NRTIs): Zidovudine, Lamivudine or combination | pregnant mice and pups                 | QPCR                                                            | mtDNA damage detected; nDNA damage not measured (note that this and many other NRTI studies also showed mtDNA depletion) | Chan et al., 2007                             |
| Peroxynitrite                                                                              | HASMC, HUVEC cells                     | QPCR                                                            | variable, up to several fold (nDNA damage often undetectable)                                                            | Ballinger et al., 2000                        |
|                                                                                            | mouse liver; dosing with acetaminophen | slot blot for DNA quantity, gel analysis for nDNA fragmentation | not a direct quantitative comparison; mtDNA depletion and nDNA fragmentation observed                                    | Cover et al., 2005                            |
| Polycyclic aromatic hydrocarbons                                                           | isolated DNA                           | Liquid Scintillation Counting (LSC)                             | 47 – 589                                                                                                                 | Allen and Coombs 1980                         |
| Rotenone                                                                                   | ARPE cells                             | QPCR                                                            | up to 2                                                                                                                  | Wang et al., 2009                             |
| Tert-butyl hydroperoxide                                                                   | human blood lymphocytes                | PCR                                                             | not a direct quantitative comparison; mtDNA depletion and damage observed                                                | Hollins et al., 2006                          |
| Tirapazamine (with hypoxia)                                                                | LXFL529 cells                          | QPCR                                                            | ~2                                                                                                                       | Ayala-Torres et al., 2000                     |
| Troglitazone                                                                               | primary human hepatocytes              | Alkaline Southern Blot                                          | toxicity was rescued by a mitochondrial-targeted DNA repair enzyme                                                       | Rachek et al 2009                             |

|                         |                                                                                                                                                     |                     |                               |                                                                                                                                                     |
|-------------------------|-----------------------------------------------------------------------------------------------------------------------------------------------------|---------------------|-------------------------------|-----------------------------------------------------------------------------------------------------------------------------------------------------|
| Ultraviolet C radiation | multiple models: cell culture, <i>C. elegans</i> , purified DNA                                                                                     | Southern Blot, QPCR | ~1                            | LeDoux et al. 1992; Kalinowski et al., 1992; Ayala-Torres et al., 2000; Meyer et al., 2007; Boyd et al., 2010; Bess et al., 2012; Bess et al., 2013 |
| Vincristine             | Exposure of young adult (12 h post-L4) <i>C. elegans</i> to 1 mM in NGM plates for 12 h resulted in ~0.7 nDNA lesions/10 kb, vs ~0.3 mtDNA lesions. | QPCR                | <1 (no mtDNA damage detected) | unpublished data: Meyer JN, Sendoel A, Hengartner MO, Van Houten B                                                                                  |

## References

- Anson, R. M., Hudson, E. and Bohr, V. A. (2000). Mitochondrial endogenous oxidative damage has been overestimated. *Faseb J.* **14**, 355-360.
- Allen, J. A. and Coombs, M. M. (1980). Covalent binding of polycyclic aromatic compounds to mitochondrial and nuclear DNA. *Nature* **287**, 244-245.
- Anson, R. M., Croteau, D. L., Stierum, R. H., Filburn, C., Parsell, R. and Bohr, V. A. (1998). Homogenous repair of singlet oxygen-induced DNA damage in differentially transcribed regions and strands of human mitochondrial DNA. *Nucleic Acids Res.* **26**, 662-668.
- Ayala-Torres, S., Chen, Y., Svoboda, T., Rosenblatt, J. and Van Houten, B. (2000). Analysis of gene-specific DNA damage and repair using quantitative polymerase chain reaction. *Methods* **22**, 135-147.
- Backer, J. M. and Weinstein, I. B. (1982). Interaction of benzo(a)pyrene and its dihydrodiol-epoxide derivative with nuclear and mitochondrial DNA in C3H10T 1/2 cell cultures. *Cancer Res.* **42**, 2764-2769.
- Backer, J. M. and Weinstein, I. B. (1980). Mitochondrial DNA is a major cellular target for a dihydrodiol-epoxide derivative of benzo[a]pyrene. *Science* **209**, 297-299.
- Bailey, S. M., Robinson, G., Pinner, A., Chamlee, L., Ulasova, E., Pompilius, M., Page, G. P., Chheng, D., Jhala, N., Landar, A., Kharbanda, K. K., Ballinger, S. and Darley-Usmar, V. (2006). S-adenosylmethionine prevents chronic alcohol-induced mitochondrial dysfunction in the rat liver. *Am. J. Physiol.-Gastr. L.* **291**, G857-867.
- Balansky, R., Izzotti, A., Scatolini, L., D'Agostini, F. and De Flora, S. (1996). Induction by carcinogens and chemoprevention by N-acetylcysteine of adducts to mitochondrial DNA in rat organs. *Cancer Res.* **56**, 1642-1647.
- Ballinger, S. W., Boudier, T. G., Davis, G. S., Judice, S. A., Nicklas, J. A. and Albertini, R. J. (1996). Mitochondrial genome damage associated with cigarette smoking. *Cancer Res.* **56**, 5692-5697.
- Ballinger, S. W., Patterson, C., Yan, C. N., Doan, R., Burow, D. L., Young, C. G., Yakes, F. M., Van Houten, B., Ballinger, C. A., Freeman, B. A. and Runge, M. S. (2000). Hydrogen peroxide- and peroxy-nitrite-induced mitochondrial DNA damage and dysfunction in vascular endothelial and smooth muscle cells. *Circ. Res.* **86**, 960-966.
- Ballinger, S. W., Van Houten, B., Jin, G. F., Conklin, C. A. and Godley, B. F. (1999). Hydrogen peroxide causes significant mitochondrial DNA damage in human RPE cells. *Exp. Eye Res.* **68**, 765-772.
- Bess, A. S., Crocker, T. L., Ryde, I. T. and Meyer, J. N. (2012). Mitochondrial dynamics and autophagy aid in removal of persistent mitochondrial DNA damage in *Caenorhabditis elegans*. *Nucleic Acids Res.* **40**, 7916-7931.
- Bess, A.S., Ryde, I.I., Hinton, D.E., Meyer, J.N. (2013). UVC-induced mitochondrial degradation via autophagy correlates with mtDNA damage removal in primary human fibroblasts. *J. Biochem. Mol. Toxicol.* **27**, 28-41.
- Boamah, E. K., Brekman, A., Tomasz, M., Myeku, N., Figueiredo-Pereira, M., Hunter, S., Meyer, J., Bhosle, R. C. and Bargonetti, J. (2010). DNA Adducts of decarbamoyl mitomycin C efficiently kill cells without wild-type p53 resulting from proteasome-mediated degradation of checkpoint protein 1. *Chem. Res. Toxicol.* **23**, 1151-1162.

- Boyd, W. A., Crocker, T. L., Rodriguez, A. M., Leung, M. C., Lehmann, D. W., Freedman, J. H., Van Houten, B. and Meyer, J. N. (2010). Nucleotide excision repair genes are expressed at low levels and are not detectably inducible in *Caenorhabditis elegans* somatic tissues, but their function is required for normal adult life after UVC exposure. *Mutat. Res.* **683**, 57-67.
- Brar, S. S., Meyer, J. N., Bortner, C. D., Van Houten, B. and Martin, W. J., 2nd (2012). Mitochondrial DNA-depleted A549 cells are resistant to bleomycin. *Am. J. Physiol. Lung. Cell. Mol. Physiol.* **303**, L413-424.
- Cakir, Y., Yang, Z., Knight, C. A., Pompilius, M., Westbrook, D., Bailey, S. M., Pinkerton, K. E. and Ballinger, S. W. (2007). Effect of alcohol and tobacco smoke on mtDNA damage and atherogenesis. *Free Radic. Biol. Med.* **43**, 1279-1288.
- Chan, S. S., Santos, J. H., Meyer, J. N., Mandavilli, B. S., Cook, D. L., Jr., McCash, C. L., Kissling, G. E., Nyska, A., Foley, J. F., van Houten, B., Copeland, W. C., Walker, V. E., Witt, K. L. and Bishop, J. B. (2007). Mitochondrial toxicity in hearts of CD-1 mice following perinatal exposure to AZT, 3TC, or AZT/3TC in combination. *Environ. Mol. Mutagen.* **48**, 190-200.
- Cover, C., Mansouri, A., Knight, T. R., Bajt, M. L., Lemasters, J. J., Pessayre, D. and Jaeschke, H. (2005). Peroxynitrite-induced mitochondrial and endonuclease-mediated nuclear DNA damage in acetaminophen hepatotoxicity. *J. Pharmacol. Exp. Ther.* **315**, 879-887.
- Cullinane, C., Cutts, S. M., Panousis, C. and Phillips, D. R. (2000). Interstrand cross-linking by adriamycin in nuclear and mitochondrial DNA of MCF-7 cells. *Nucleic Acids Res.* **28**, 1019-1025.
- Davis, C. D., Schut, H. A. and Snyderwine, E. G. (1994). Adduction of the heterocyclic amine food mutagens IQ and PhIP to mitochondrial and nuclear DNA in the liver of Fischer-344 rats. *Carcinogenesis* **15**, 641-645.
- Divi, R. L., Beland, F. A., Fu, P. P., Von Tungeln, L. S., Schoket, B., Camara, J. E., Ghei, M., Rothman, N., Sinha, R. and Poirier, M. C. (2002). Highly sensitive chemiluminescence immunoassay for benzo[a]pyrene-DNA adducts: validation by comparison with other methods, and use in human biomonitoring. *Carcinogenesis* **23**, 2043-2049.
- Egilsson, V., Evans, I. H. and Wilkie, D. (1979). Toxic and mutagenic effects of carcinogens on the mitochondria of *Saccharomyces cerevisiae*. *Mol. Gen. Genet.* **174**, 39-46.
- Eizirik, D. L. and Kisby, G. E. (1995). Cycad toxin-induced damage of rodent and human pancreatic beta-cells. *Biochem. Pharmacol.* **50**, 355-365.
- Englander, E. W., Greeley, G. H., Jr., Wang, G., Perez-Polo, J. R. and Lee, H. M. (1999). Hypoxia-induced mitochondrial and nuclear DNA damage in the rat brain. *J. Neurosci. Res.* **58**, 262-269.
- Furda, A. M., Marrangoni, A. M., Lokshin, A. and Van Houten, B. (2012). Oxidants and not alkylating agents induce rapid mtDNA loss and mitochondrial dysfunction. *DNA Repair (Amst.)* **11**, 684-692.
- Giurgiovi, A. J., Diwan, B. A., Olivero, O. A., Anderson, L. M., Rice, J. M. and Poirier, M. C. (1997). Elevated mitochondrial cisplatin-DNA adduct levels in rat tissues after transplacental cisplatin exposure. *Carcinogenesis* **18**, 93-96.
- Hollins, D. L., Suliman, H. B., Piantadosi, C. A. and Carraway, M. S. (2006). Glutathione regulates susceptibility to oxidant-induced mitochondrial DNA damage in human lymphocytes. *Free Radic. Biol. Med.* **40**, 1220-1226.
- Hunter, S. E., Gustafson, M. A., Margillo, K. M., Lee, S. A., Ryde, I. T. and Meyer, J. N. (2012). *In vivo* repair of alkylating and oxidative DNA damage in the mitochondrial and nuclear genomes of wild-type and glycosylase-deficient *Caenorhabditis elegans*. *DNA Repair (Amst.)* **11**, 857-863.
- Jung, D., Cho, Y., Collins, L.B., Swenberg, J.A., and Di Giulio, R.T. (2009). Effects of benzo[a]pyrene on mitochondrial and nuclear DNA damage in Atlantic killifish (*Fundulus heteroclitus*) from a creosote-contaminated and reference site. *Aquat. Toxicol.* **95**, 44-51.
- Jung, D., Cho, Y., Meyer, J.N., and Di Giulio, R. T. (2009). The long amplicon quantitative PCR for DNA damage assay as a sensitive method of assessing DNA damage in the environmental model, Atlantic killifish (*Fundulus heteroclitus*). *Comp. Biochem. Physiol. C Toxicol. Pharmacol.* **149**, 182-186.
- Jung, D., and Di Giulio, R. T. (2010). Identification of mitochondrial cytochrome P450 induced in response to polycyclic aromatic hydrocarbons in the mummichog (*Fundulus heteroclitus*) *Comp. Biochem. Physiol. C Toxicol. Pharmacol.* **151**, 107-112.
- Kalinowski, D. P., Illenye, S. and Van Houten, B. (1992). Analysis of DNA damage and repair in murine leukemia L1210 cells using a quantitative polymerase chain reaction assay. *Nucleic Acids Res.* **20**, 3485-3494.

- Koczor, C. A., Shokolenko, I. N., Boyd, A. K., Balk, S. P., Wilson, G. L. and LeDoux, S. P. (2009). Mitochondrial DNA damage initiates a cell cycle arrest by a Chk2-associated mechanism in mammalian cells. *J. Biol. Chem.* **284**, 36191-36201.
- Lariviere, F. J., Newman, A. G., Watts, M. L., Bradley, S. Q., Juskewitch, J. E., Greenwood, P. G. and Millard, J. T. (2009). Quantitative PCR analysis of diepoxybutane and epihalohydrin damage to nuclear versus mitochondrial DNA. *Mutat. Res.* **664**, 48-54.
- Lebrecht, D., Kokkori, A., Ketelsen, U. P., Setzer, B. and Walker, U. A. (2005). Tissue-specific mtDNA lesions and radical-associated mitochondrial dysfunction in human hearts exposed to doxorubicin. *J. Pathol.* **207**, 436-444.
- LeDoux, S. P., Wilson, G. L., Beecham, E. J., Stevensner, T., Wassermann, K. and Bohr, V. A. (1992). Repair of mitochondrial DNA after various types of DNA damage in Chinese hamster ovary cells. *Carcinogenesis* **13**, 1967-1973.
- Mandavilli, B. S., Ali, S. F. and Van Houten, B. (2000). DNA damage in brain mitochondria caused by aging and MPTP treatment. *Brain Res.* **885**, 45-52.
- Mandavilli, B. S., Boldogh, I. and Van Houten, B. (2005). 3-nitropropionic acid-induced hydrogen peroxide, mitochondrial DNA damage, and cell death are attenuated by Bcl-2 overexpression in PC12 cells. *Brain Res. Mol. Brain Res.* **133**, 215-223.
- Meyer, J. N., Boyd, W. A., Azzam, G. A., Haugen, A. C., Freedman, J. H. and Van Houten, B. (2007). Decline of nucleotide excision repair capacity in aging *Caenorhabditis elegans*. *Genome Biol.* **8**, R70.
- Murata, T., Hibasami, H., Maekawa, S., Tagawa, T. and Nakashima, K. (1990). Preferential binding of cisplatin to mitochondrial DNA and suppression of ATP generation in human malignant melanoma cells. *Biochem. Int.* **20**, 949-955.
- Myers, K. A., Saffhill, R. and O'Connor, P. J. (1988). Repair of alkylated purines in the hepatic DNA of mitochondria and nuclei in the rat. *Carcinogenesis* **9**, 285-292.
- Niranjan, B. G., Bhat, N. K. and Avadhani, N. G. (1982). Preferential attack of mitochondrial DNA by aflatoxin B<sub>1</sub> during hepatocarcinogenesis. *Science* **215**, 73-75.
- Niranjan, B. G., Schaefer, H., Ritter, C. and Avadhani, N. G. (1986). Protection of mitochondrial genetic system against aflatoxin B<sub>1</sub> binding in animals resistant to aflatoxicosis. *Cancer Res.* **46**, 3637-3641.
- Olivero, O. A., Semino, C., Kassim, A., Lopez-Larraza, D. M. and Poirier, M. C. (1995). Preferential binding of cisplatin to mitochondrial DNA of Chinese hamster ovary cells. *Mutat. Res.* **346**, 221-230.
- Onuki, J., Chen, Y., Teixeira, P. C., Schumacher, R. I., Medeiros, M. H., Van Houten, B. and Di Mascio, P. (2004). Mitochondrial and nuclear DNA damage induced by 5-aminolevulinic acid. *Arch. Biochem. Biophys.* **432**, 178-187.
- Palmeira, C. M., Serrano, J., Kuehl, D. W. and Wallace, K. B. (1997). Preferential oxidation of cardiac mitochondrial DNA following acute intoxication with doxorubicin. *Biochim. Biophys. Acta* **1321**, 101-106.
- Perin-Roussel, O., Perin, F., Barat, N., Plessis, M. J. and Zajdela, F. (1995). Interaction of 7H-dibenzo[c,g]carbazole and its organospecific derivatives with hepatic mitochondrial and nuclear DNA in the mouse. *Environ. Mol. Mutagen.* **25**, 202-210.
- Rachek, L. I., Yuzefovych, L. V., Ledoux, S. P., Julie, N. L. and Wilson, G. L. (2009). Troglitazone, but not rosiglitazone, damages mitochondrial DNA and induces mitochondrial dysfunction and cell death in human hepatocytes. *Toxicol. Appl. Pharmacol.* **240**, 348-354.
- Salazar, J. J. and Van Houten, B. (1997). Preferential mitochondrial DNA injury caused by glucose oxidase as a steady generator of hydrogen peroxide in human fibroblasts. *Mutat. Res.* **385**, 139-149.
- Santos, J. H., Hunakova, L., Chen, Y., Bortner, C. and Van Houten, B. (2003). Cell sorting experiments link persistent mitochondrial DNA damage with loss of mitochondrial membrane potential and apoptotic cell death. *J. Biol. Chem.* **278**, 1728-1734.
- Santos, J. H., Meyer, J. N., Skorvaga, M., Annab, L. A. and Van Houten, B. (2004). Mitochondrial hTERT exacerbates free-radical-mediated mtDNA damage. *Aging Cell* **3**, 399-411.
- Santos, J. H., Meyer, J. N. and Van Houten, B. (2006). Mitochondrial localization of telomerase as a determinant for hydrogen peroxide-induced mitochondrial DNA damage and apoptosis. *Hum. Mol. Genet.* **15**, 1757-1768.
- Shamsuddin, A. M., Harris, C. C. and Hinzman, M. J. (1987). Localization of aflatoxin B<sub>1</sub>--nucleic acid adducts in mitochondria and nuclei. *Carcinogenesis* **8**, 109-114.



- Shen, D., Dalton, T. P., Nebert, D. W. and Shertzer, H. G. (2005). Glutathione redox state regulates mitochondrial reactive oxygen production. *J. Biol. Chem.* **280**, 25305-25312.
- Stairs, P. W., Guzelian, P. S. and Van Tuyle, G. C. (1983). Benzo[a]pyrene differentially alters mitochondrial and nuclear DNA synthesis in primary hepatocyte cultures. *Res. Commun. Chem. Path.* **42**, 95-106.
- Stepanov, I. and Hecht, S. S. (2009). Mitochondrial DNA adducts in the lung and liver of F344 rats chronically treated with 4-(methylnitrosamino)-1-(3-pyridyl)-1-butanone and (S)-4-(methylnitrosamino)-1-(3-pyridyl)-1-butanol. *Chem. Res. Toxicol.* **22**, 406-414.
- Suliman, H. B., Carraway, M. S. and Piantadosi, C. A. (2003). Postlipopolysaccharide oxidative damage of mitochondrial DNA. *Am. J. Respir. Crit. Care Med.* **167**, 570-579.
- Suliman, H. B., Welty-Wolf, K. E., Carraway, M., Tatro, L. and Piantadosi, C. A. (2004). Lipopolysaccharide induces oxidative cardiac mitochondrial damage and biogenesis. *Cardiovasc. Res.* **64**, 279-288.
- Suliman, H. B., Welty-Wolf, K. E., Carraway, M. S., Schwartz, D. A., Hollingsworth, J. W. and Piantadosi, C. A. (2005). Toll-like receptor 4 mediates mitochondrial DNA damage and biogenic responses after heat-inactivated *E. coli*. *Faseb J.* **19**, 1531-1533.
- Thomas, R. D. and Roy, D. (2001). Stilbene estrogen produces higher levels of mitochondrial DNA adducts than nuclear DNA adducts in the target organ of cancer (liver) of male Sprague Dawley rats. *Oncol. Rep.* **8**, 1035-1038.
- Wang, A. L., Lukas, T. J., Yuan, M., Du, N., Tso, M. O. and Neufeld, A. H. (2009). Autophagy and exosomes in the aged retinal pigment epithelium: possible relevance to drusen formation and age-related macular degeneration. *PLoS ONE* **4**, e4160.
- Wang, G., Hazra, T. K., Mitra, S., Lee, H. M. and Englander, E. W. (2000). Mitochondrial DNA damage and a hypoxic response are induced by CoCl<sub>2</sub> in rat neuronal PC12 cells. *Nucleic Acids Res.* **28**, 2135-2140.
- Wilkinson, R., Hawks, A. and Pegg, A. E. (1975). Methylation of rat liver mitochondrial deoxyribonucleic acid by chemical carcinogens and associated alterations in physical properties. *Chem. Biol. Interact.* **10**, 157-167.
- Wills, L. P., Jung, D., Koehn, K., Zhu, S., Willett, K. L., Hinton, D. E. and Di Giulio, R. T. (2010). Comparative chronic liver toxicity of benzo[a]pyrene in two populations of the atlantic killifish (*Fundulus heteroclitus*) with different exposure histories. *Environ. Health Perspect.* **118**, 1376-1381.
- Wunderlich, V., Schutt, M., Bottger, M. and Graffi, A. (1970). Preferential alkylation of mitochondrial deoxyribonucleic acid by N-methyl-N-nitrosourea. *Biochem. J.* **118**, 99-109.
- Wunderlich, V., Tetzlaff, I. and Graffi, A. (1972). Studies on nitrosodimethylamine: preferential methylation of mitochondrial DNA in rats and hamsters. *Chem. Biol. Interact.* **4**, 81-89.
- Yakes, F. M. and Van Houten, B. (1997). Mitochondrial DNA damage is more extensive and persists longer than nuclear DNA damage in human cells following oxidative stress. *Proc. Natl. Acad. Sci. U.S.A.* **94**, 514-519.
- Yamaguchi, H., Kajitani, K., Dan, Y., Furuichi, M., Ohno, M., Sakumi, K., Kang, D. and Nakabeppu, Y. (2006). MTH1, an oxidized purine nucleoside triphosphatase, protects the dopamine neurons from oxidative damage in nucleic acids caused by 1-methyl-4-phenyl-1,2,3,6-tetrahydropyridine. *Cell Death Differ.* **13**, 551-563.
- Yanez, J. A., Teng, X. W., Roupe, K. A., Fariss, M. W. and Davies, N. M. (2003). Chemotherapy induced gastrointestinal toxicity in rats: involvement of mitochondrial DNA, gastrointestinal permeability and cyclooxygenase -2. *J. Pharm. Pharm. Sci.* **6**, 308-314.
- Yang, Z., Schumaker, L. M., Egorin, M. J., Zuhowski, E. G., Guo, Z. and Cullen, K. J. (2006). Cisplatin preferentially binds mitochondrial DNA and voltage-dependent anion channel protein in the mitochondrial membrane of head and neck squamous cell carcinoma: possible role in apoptosis. *Clin. Cancer Res.* **12**, 5817-5825.
